# Supplementary material
Source: Elsevier journal article supplement (https://www.sciencedirect.com/science/article/pii/S030028962030106X)
Supplement: mmc1 [file S030028962030106X:mmc1.pdf]

## MATERIAL ADICIONAL

### Anexo 1. Clasificación de las recomendaciones y calidad de la evidencia según el sistema GRADE.

**Tabla 1. Significado de los 4 niveles de de calidad de la evidencia. Aguayo-Albasini JL, Flores-Pastor B, Soria-Aledo V. Sistema GRADE: clasificación de la calidad de la evidencia y graduación de la fuerza de la recomendación. Cir Esp. 2014;92:82-8.**

| Niveles de calidad | Definición actual                                                                                                       | Concepto anterior                                                                                        |
|--------------------|-------------------------------------------------------------------------------------------------------------------------|----------------------------------------------------------------------------------------------------------|
| Alto               | Alta confianza en la coincidencia entre el efecto real y el estimado                                                    | La confianza en la estimación del efecto no variará en posteriores estudios                              |
| Moderado           | Moderada confianza en la estimación del efecto. Hay posibilidad de que el efecto real esté alejado del efecto estimado. | Posteriores estudios pueden tener un importante impacto en nuestra confianza en la estimación del efecto |
| Bajo               | Confianza limitada en la estimación del efecto. El efecto real puede estar lejos del estimado                           | Es muy probable que posteriores estudios cambien nuestra confianza en la estimación del efecto           |
| Muy bajo           | Poca confianza en el efecto estimado. El efecto verdadero muy probablemente sea diferente al estimado.                  | Cualquier estimación es muy incierta                                                                     |

La fuerza de las recomendaciones según GRADE como Recomendación fuerte o Recomendación débil se basa en el balance entre los beneficios y riesgos, la calidad de la evidencia, los valores preferencias de los pacientes y, finalmente los costes o utilización de recursos. Alonso-Coello P, Rigau D, Sanabria AJ, Plaza V, Miravittles M, Martínez L. Arch Bronconeumol. 2013;49:261–7.

Las recomendaciones fuertes o débiles tendrán implicaciones diferentes en el caso de los pacientes, los profesionales sanitarios o los gestores (Tabla 2).

**Tabla 2. Implicaciones de la fuerza de las recomendaciones. Alonso-Coello P, Rigau D, Sanabria AJ, Plaza V, Miravittles M, Martínez L. Arch Bronconeumol. 2013;49:261–7.**

|                                   | <b>Recomendación fuerte</b>                                                                                                  | <b>Recomendación débil</b>                                                                                                                                                                          |
|-----------------------------------|------------------------------------------------------------------------------------------------------------------------------|-----------------------------------------------------------------------------------------------------------------------------------------------------------------------------------------------------|
| Para los pacientes                | La mayoría de las personas estarían de acuerdo con la intervención recomendada y únicamente una pequeña parte no lo estarían | La mayoría de las personas estarían de acuerdo con la acción recomendada pero un número importante de ellas no                                                                                      |
| Para los profesionales sanitarios | La mayoría de los pacientes deberían recibir la intervención recomendada                                                     | Se reconoce que diferentes opciones son apropiadas para diferentes pacientes y que el médico tiene que ayudar a cada paciente a llegar a la decisión más consistente con sus valores y preferencias |
| Para los gestores                 | La recomendación puede ser adoptada como política sanitaria en la mayoría de las situaciones                                 | Existe necesidad de un debate importante con la participación de los grupos de interés                                                                                                              |
